# Supplementary material for: A tetrathienopyrrole-based ladder-type donor polymer for high-performance organic near-infrared cavity detectors
Source: Royal Society of Chemistry journal article supplement (doi:10.1039/d3mh01010d), 2023-01-01
Supplement: d3mh01010d1.pdf [file d3mh01010d1.pdf]

## ELECTRONIC SUPPLEMENTARY INFORMATION

### 1. Materials and methods

NMR chemical shifts ( $\delta$ , in ppm) for all precursors and monomers were determined relative to the residual  $\text{CHCl}_3$  (7.26 ppm) signal or the  $^{13}\text{C}$  resonance shift of  $\text{CDCl}_3$  (77.16 ppm) at room temperature. Matrix-assisted laser desorption/ionization - time-of-flight (MALDI-ToF) mass spectra were recorded on a Bruker Daltonics ultrafleXtreme MALDI/TOF-TOF system. 10  $\mu\text{L}$  of the matrix solution (20  $\text{mg mL}^{-1}$  *trans*-2-[3-(4-*tert*-butylphenyl)-2-methyl-2-propenylidene]malononitrile (DTCB) in chloroform) was mixed with an analyte solution of approximately 1  $\text{mg mL}^{-1}$ . 1  $\mu\text{L}$  of this solution was spotted onto an MTP Anchorchip 600/384 MALDI plate. Polymer molar mass distributions were estimated by size exclusion chromatography at 160  $^\circ\text{C}$  on an Agilent 1260 Infinity II High-Temperature GPC system using a PL-GEL 10  $\mu\text{m}$  MIXED-B column with 1,2,4-trichlorobenzene as the eluent and using polystyrene internal standards. Background corrected UV-Vis-NIR absorption spectroscopy measurements were performed on a VARIAN Cary 5000 UV-Vis-NIR spectrophotometer at a scan rate of 600  $\text{nm min}^{-1}$ . The films for the UV-Vis-NIR absorption measurements were prepared by drop-casting a solution of the respective polymer in  $\text{CHCl}_3$  on a quartz substrate. The solid-state UV-Vis-NIR absorption spectra were used to estimate the optical gaps (from the wavelength at the intersection of the tangent line drawn at the low energy side of the absorption spectrum with the baseline:  $E_g$  (eV) = 1240/(wavelength in nm)). Electrochemical measurements (cyclic voltammetry, CV) were performed with an Eco Chemie Autolab PGSTAT 30 potentiostat/galvanostat using a three-electrode microcell with a platinum working electrode, a platinum counter electrode, and a  $\text{Ag}/\text{AgNO}_3$  reference electrode (silver wire dipped in a solution of 0.01 M  $\text{AgNO}_3$  and 0.1 M  $\text{NBu}_4\text{PF}_6$  in anhydrous acetonitrile). The reference electrode was calibrated against ferrocene/ferrocenium as external standard. Sample preparation was done by dip-coating the platinum working electrode in the respective polymer solutions. The CV measurements were done on the resulting films with 0.1 M  $\text{NBu}_4\text{PF}_6$  in anhydrous acetonitrile as electrolyte solution. The experiments were carried out under a curtain of argon to prevent air from entering the system. Cyclic voltammograms were recorded at a scan rate of 100  $\text{mV s}^{-1}$ . For the conversion of V to eV, the onset potentials of the first oxidation/reduction peaks were used and referenced to ferrocene/ferrocenium, which has an ionization potential of -4.98 eV vs. vacuum. This correction factor is based on a value of 0.31 eV for  $\text{Fc}/\text{Fc}^+$  vs.  $\text{SCE}^1$  and a value of 4.68 eV for  $\text{SCE}^1$  vs. vacuum<sup>2</sup>:  $E_{\text{HOMO/LUMO}}$  (eV) = -4.98 -  $E_{\text{onset ox/red Ag/AgNO}_3}$  (V) +  $E_{\text{onset Fc/Fc}^+ \text{ Ag/AgNO}_3}$  (V). The accuracy of measuring redox potentials by CV is about 0.01–0.02 V. Reproducibility issues can occur due to the dependence of the potentials on concentration and temperature. Thermogravimetric analysis (TGA) was performed on a TA Instruments TGA Q5000. Measurements were performed at a heating rate of 20  $\text{K min}^{-1}$  using nitrogen (25  $\text{mL min}^{-1}$ ) as the purge gas. Sample masses of approximately 1 mg were used. Rapid heat-cool calorimetry (RHC) was performed using a prototype instrument from TA Instruments. Experiments were performed at a heating and cooling rate of 500  $\text{K min}^{-1}$ , with helium (6  $\text{mL min}^{-1}$ ) as the purge gas. Dedicated aluminum RHC crucibles were filled with around 200–250  $\mu\text{g}$  of the polymer sample. A first heating was used to remove the thermal history.

### 2. Materials synthesis and characterization

All reagents and chemicals were obtained from commercial sources and used without further purification. The quinoxaline monomer (5,8-dibromo-2,3-bis[5-(2-ethylhexyl)thiophen-2-yl]quinoxaline **8**) was synthesized according to a literature procedure.<sup>3</sup> Solvents were dried by a solvent purification system (MBraun, MB-SPS-800) equipped with alumina columns. All moisture-sensitive reactions were carried out under inert atmosphere and in flame-dried glassware. Reactions were magnetically stirred and monitored by TLC (pre-coated silica gel, 60  $\text{\AA}$  average pore diameter, 254  $\mu\text{m}$ ,

aluminum foil supported TLC plates). Compounds were visualized by UV S4 irradiation (254 nm). Automatic column chromatography was performed using a Buchi Sepacore™ flash apparatus, consisting of a C-660 Buchi fraction collector, C-615 Pump manager, C-630 UV Monitor, and two C-601 pump modules. Preparative (recycling) size exclusion chromatography (prep-SEC) was performed on a JAI LC-9110 NEXT system equipped with JAIGEL 1H and 2H columns (eluent CHCl<sub>3</sub>, flow rate 3.5 mL min<sup>-1</sup>). Solvents were evaporated with a rotary evaporator at a temperature of 45 °C. Yields refer to isolated compounds.

### 1,2-bis(2,2-diethoxyethyl)disulfide (2)

Bromo-1,1-diethoxyethane (100 mL, 664.7 mmol) was added to a mixture of S<sub>8</sub> (21.23 g, 664.7 mmol), Na<sub>2</sub>S<sub>9</sub>H<sub>2</sub>O (127.73 g, 531.8 mmol) and KI (5.52 g, 33.2 mmol) in ethanol (600 mL), and the mixture was heated to reflux for 12 h. After removing the majority of ethanol *in vacuo*, the residue was filtered and rinsed with ethyl acetate. The filtrate was washed with water (3 x 75 mL) to remove any remaining salts and the combined aqueous layers were extracted with ethyl acetate (2 x 50 mL). The combined organic phases were dried over MgSO<sub>4</sub>, filtered, and the solvent was removed *in vacuo*. The crude material was then purified by vacuum distillation (80 °C at 1.10<sup>-2</sup> mbar) to yield the desired product as a yellow liquid with ~95% purity (59.68 g, 30%). This product was used without further purification in the next reaction. Analytical data were in accordance with data previously reported in the literature.<sup>4</sup>

<sup>1</sup>H NMR (400 MHz, CDCl<sub>3</sub>): δ = 4.71 (t, *J* = 5.6 Hz, 2H), 3.73 – 3.49 (m, 8H), 2.96 (d, *J* = 5.6 Hz, 4H), 1.22 (t, *J* = 7.1 Hz, 12H).

### 3-bromo-4-[(2,2-diethoxyethyl)thio]thiophene (3)

*t*-BuLi (1.9 M in pentane, 104.4 mL, 198.4 mmol) was slowly added to a stirred solution of 3,4-dibromothiophene (11 mL, 99.2 mmol) in dry diethyl ether (1 L) at –78 °C. After stirring for 1 h at –78 °C, 1,2-bis(2,2-diethoxyethyl)disulfide (2) (31.4 mL, 109.1 mmol) was added rapidly and the mixture was stirred overnight at room temperature. The reaction was then quenched by adding water (150 mL) and the organic phase was washed with a 1.0 M NaOH solution (3 x 150 mL). The water phase was extracted with dichloromethane (3 x 150 mL) and the combined organic phases were dried over MgSO<sub>4</sub>, filtered, and the solvents were removed *in vacuo*. The product was purified by kugelrohr distillation (140 °C at 9 x 10<sup>-3</sup> mbar). The distillate was further purified by column chromatography (silica, petroleum ether:dichloromethane, 60:40) to yield the product as a pale yellow liquid (24.89 g, 81%). Analytical data were in accordance with data previously reported in the literature.<sup>4</sup>

<sup>1</sup>H NMR (400 MHz, CDCl<sub>3</sub>): δ = 7.31 (d, *J* = 3.5 Hz, 1H), 7.24 (d, *J* = 3.5 Hz, 1H), 4.65 (t, *J* = 5.6 Hz, 1H), 3.70 – 3.48 (m, 4H), 3.05 (d, *J* = 5.6 Hz, 2H), 1.19 (t, *J* = 7.1 Hz, 6H).

### 3-bromothieno[3,2-*b*]thiophene (4)

Anhydrous amberlyst 15 (20.26 g, 95.2 mmol) was added to a solution of compound 3 (26.94 g, 86.6 mmol) in diethyl ether (500 mL) and the mixture was refluxed for 10 h. The beads were removed by filtration and refluxed in a small amount of diethyl ether. This was repeated several times to extract all products from the beads. The resulting filtrate was washed with water, dried over MgSO<sub>4</sub>, filtered, and concentrated *in vacuo*. The crude material was purified by column chromatography (silica, hexanes) and kugelrohr distillation (115 °C at 7.10<sup>-3</sup> mbar) to obtain the product as a pale-yellow liquid (13.0 g, 69%). Analytical data were in accordance with data previously reported in the literature.<sup>4</sup>

<sup>1</sup>H NMR (400 MHz, CDCl<sub>3</sub>): δ = 7.43 (dd, *J* = 5.2, 1.4 Hz, 1H), 7.29 (d, *J* = 5.2 Hz, 1H), 7.28 (d, *J* = 1.5 Hz, 1H).

### 3,3'-dibromo-2,2'-bithieno[3,2-*b*]thiophene (5)

Lithium diisopropylamide (LDA) was prepared by adding *n*-BuLi (2.5 M in hexane, 10 mL, 25.1 mmol) dropwise to a solution of diisopropylamine (3.4 mL, 25.1 mmol) in THF (10 mL) at 0 °C. The fresh LDA solution was added dropwise to a solution of 3-bromothieno[3,2-*b*]thiophene (**4**) (5.0 g, 22.81 mmol) in THF (50 mL) at –78 °C and the mixture was stirred for 1 h at this temperature. After adding CuCl<sub>2</sub> (3.37 g, 25.10 mmol) at –78 °C, the mixture was allowed to gently reach room temperature and the reaction was continued for 12 h at room temperature. THF was removed *in vacuo*, diethyl ether (200 mL) was added, and the mixture was washed with water (3 x 50 mL). The aqueous phase was extracted with dichloromethane (3 x 50 mL) and the combined organic phases were dried over MgSO<sub>4</sub>, filtered, and concentrated *in vacuo*. The crude product was then redissolved in chloroform and purified by recrystallization in ethanol and column chromatography (silica, hexanes) to yield a fluffy yellow powder (2.43 g, 48%). Analytical data were in accordance with data previously reported in the literature.<sup>5</sup>

<sup>1</sup>H NMR (400 MHz, CDCl<sub>3</sub>): δ = 7.50 (d, *J* = 5.2 Hz, 2H), 7.33 (d, *J* = 5.2 Hz, 2H).

### 9-dodecyl-9*H*-thieno[2',3':4,5]thieno[3,2-*b*]thieno[2',3':4,5]thieno[2,3-*d*]pyrrole (6)

A solution of compound **5** (600 mg, 1.38 mmol), *t*-BuONa (317 mg, 3.30 mmol), Pd<sub>2</sub>dba<sub>3</sub> (63 mg, 0.069 mmol), BINAP (171 mg, 0.28 mmol), and dodecylamine (255 mg, 1.38 mmol) in dry toluene (15 mL) was refluxed overnight under inert atmosphere. Equal amounts of Pd<sub>2</sub>dba<sub>3</sub> and BINAP were added and the mixture was again refluxed overnight under inert atmosphere. Diethyl ether (50 mL) was added and the solution was washed with water (3 x 75 mL). The aqueous phase was extracted with dichloromethane (75 mL) and the combined organic phases were dried over MgSO<sub>4</sub>, filtered, and concentrated *in vacuo*. The crude product was purified by column chromatography (silica, hexanes:dichloromethane, 80:20) to yield the pure product as a yellow solid (411 mg, 65%).

<sup>1</sup>H NMR (400 MHz, CDCl<sub>3</sub>): δ = 7.28 (d, *J* = 5.2 Hz, 2H), 7.25 (d, *J* = 5.2 Hz, 2H), 4.34 (t, *J* = 7.1 Hz, 2H), 1.96 (p, *J* = 7.2 Hz, 2H), 1.47 – 1.37 (m, 2H), 1.36 – 1.18 (m, 16H), 0.89 (t, *J* = 6.9 Hz, 3H).

<sup>13</sup>C NMR (100 MHz, CDCl<sub>3</sub>): δ = 138.5, 134.8, 123.7, 123.6, 121.3, 117.9, 48.4, 32.0, 31.7, 29.7, 29.6, 29.49, 29.45, 29.35, 26.9, 22.8, 14.3.

MALDI-ToF-MS: calcd. for C<sub>24</sub>H<sub>29</sub>NS<sub>4</sub> [M]<sup>+</sup>: *m/z* = 459.12, measured: *m/z* = 459.15.

### 9-dodecyl-2,7-bis(trimethylstannyl)-9*H*-thieno[2',3':4,5]thieno[3,2-*b*]thieno[2',3':4,5]thieno[2,3-*d*]pyrrole (7)

*n*-BuLi (2.5 M in hexane, 1.3 mL, 3.33 mmol) was added dropwise to a solution of TTP **6** (383 mg, 0.83 mmol) in THF (15 mL) at –78 °C. After the reaction was stirred for 1 h at –78 °C, trimethyltin chloride (3.8 mL, 3.75 mmol) was added rapidly and the reaction was allowed to stir overnight. The crude material was purified *via* prep-SEC and the stannylated product was obtained as a yellow solid (400 mg, 61%).

<sup>1</sup>H NMR (400 MHz, CDCl<sub>3</sub>): δ = 7.31 (s, 2H), 4.41 (t, *J* = 7.1 Hz, 2H), 2.07 – 1.91 (m, 2H), 1.47 – 1.18 (m, 18H), 0.87 (t, *J* = 9.2, 3H), 0.37 (s, 18H).

MALDI-ToF-MS: calcd. for C<sub>30</sub>H<sub>45</sub>NS<sub>4</sub>Sn<sub>2</sub> [M]<sup>+</sup>: *m/z* = 785.05, measured: *m/z* = 785.08.

### PTTPQx

9-Dodecyl-2,7-bis(trimethylstannyl)-9*H*-thieno[2',3':4,5]thieno[3,2-*b*]thieno[2',3':4,5]thieno[2,3-*d*]pyrrole (**7**) (90.0 mg, 0.11 mmol), 5,8-dibromo-2,3-bis[5-(2-ethylhexyl)thiophen-2-yl]quinoxaline (**8**)

(76.9 mg, 0.11 mmol), tris(dibenzylideneacetone)dipalladium(0) (3.1 mg, 3  $\mu\text{mol}$ ) and tri(*ortho*-tolyl)phosphine (4.1 mg, 12  $\mu\text{mol}$ ) were dissolved in dry, degassed chlorobenzene (1.6 mL). The resulting mixture was stirred at 130 °C for 24 h, after which the crude polymer was diluted in chlorobenzene (5 mL). Diethylammonium diethyldithiocarbamate (50 mg) was added and the mixture was stirred at 100 °C for 1 h. The resulting mixture was poured out in methanol. The obtained precipitate was filtered in a thimble and purified by repetitive Soxhlet extractions using methanol, acetone, *n*-hexane, dichloromethane, and chloroform. The chloroform fraction obtained from Soxhlet extraction was added to methanol and the resulting precipitate was filtered and dried, yielding a dark green solid (54 mg, 50%). GPC (1,2,4-trichlorobenzene, 160 °C, PS standards):  $M_n = 12.8 \text{ kg/mol}$ ,  $\mathcal{D} = 2.3$ . UV-Vis-NIR:  $\lambda_{\text{max, film}} = 732 \text{ nm}$ .

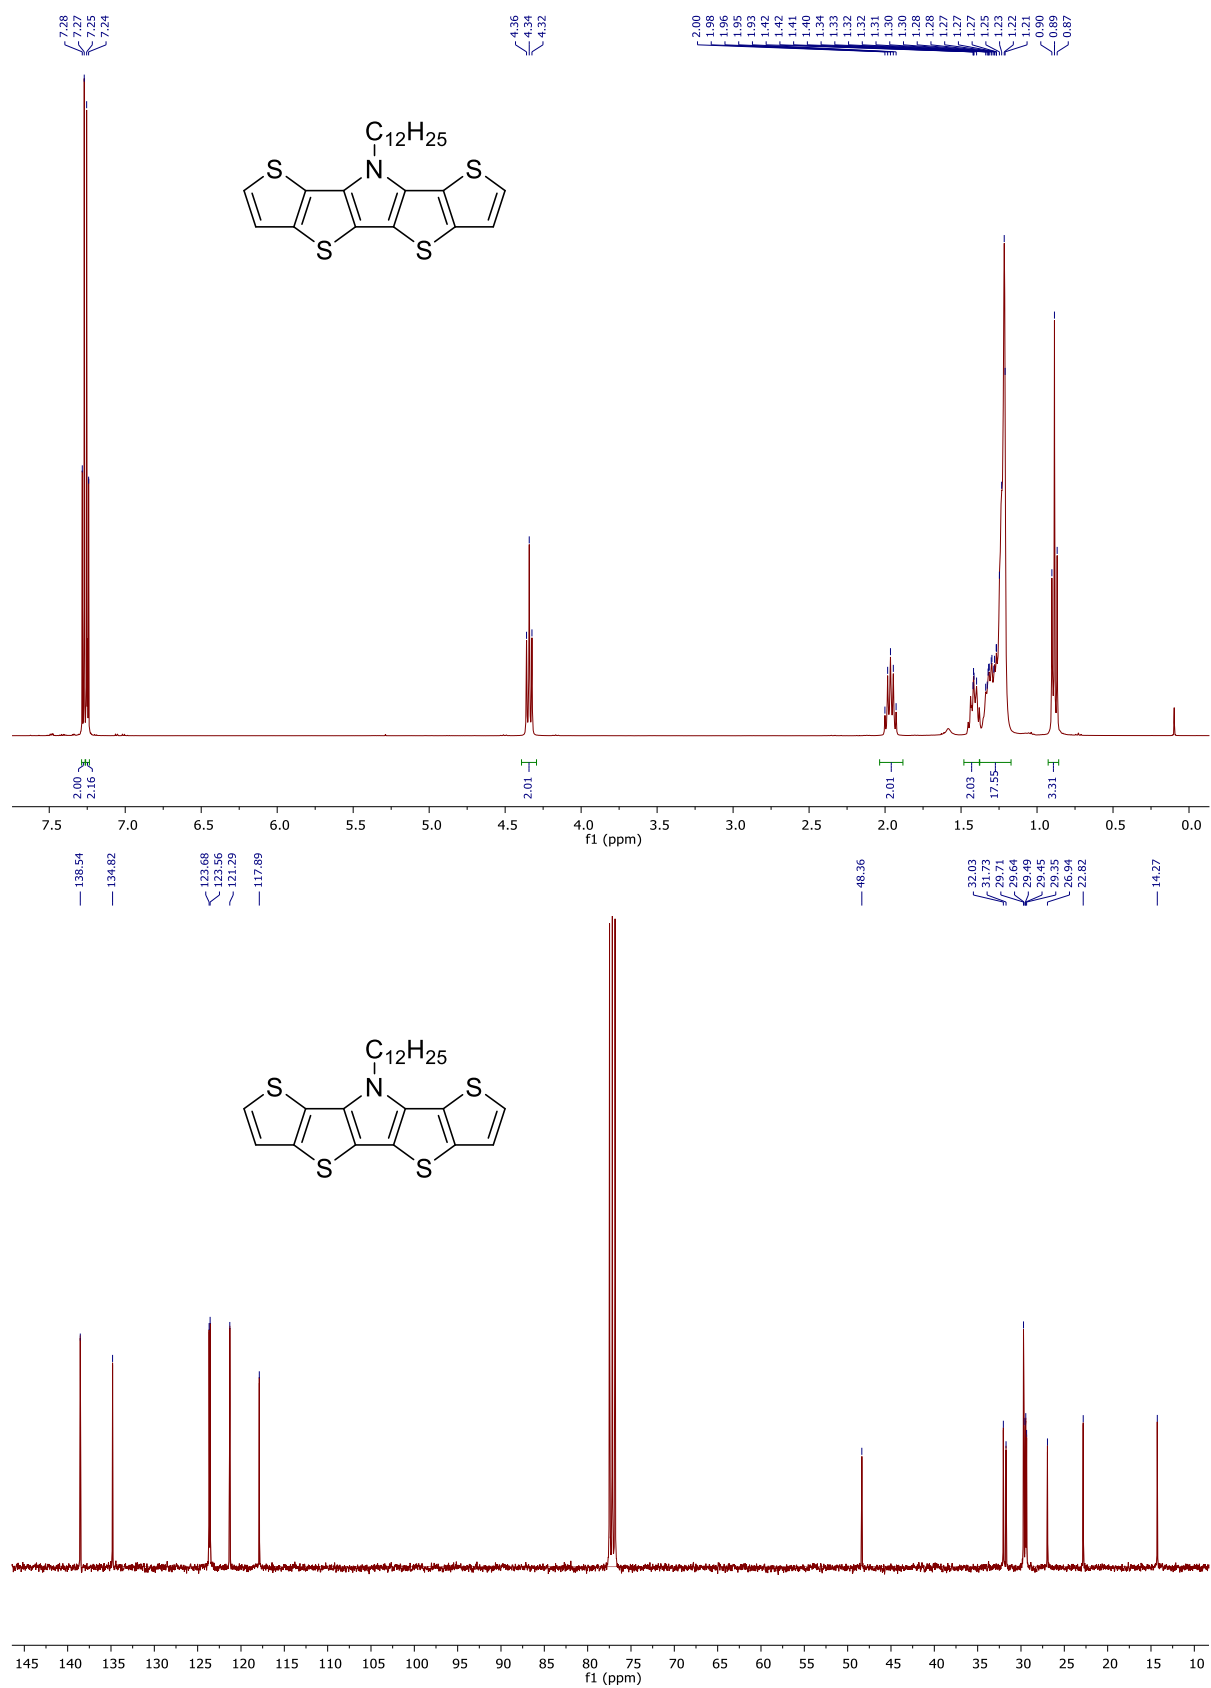

Figure S1: <sup>1</sup>H (top) and <sup>13</sup>C (bottom) NMR spectra of TTP monomer 6.

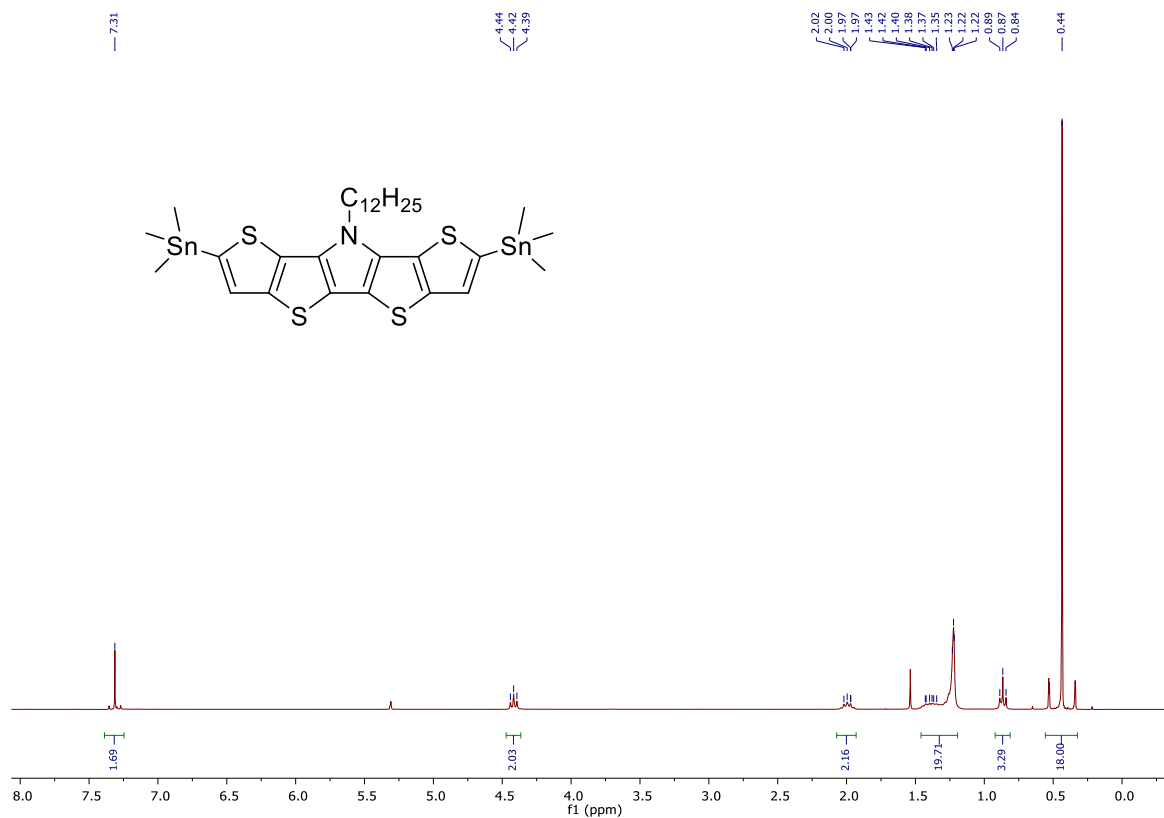

Figure S2:  $^1\text{H}$  NMR spectrum of stannylated TTP monomer 7.

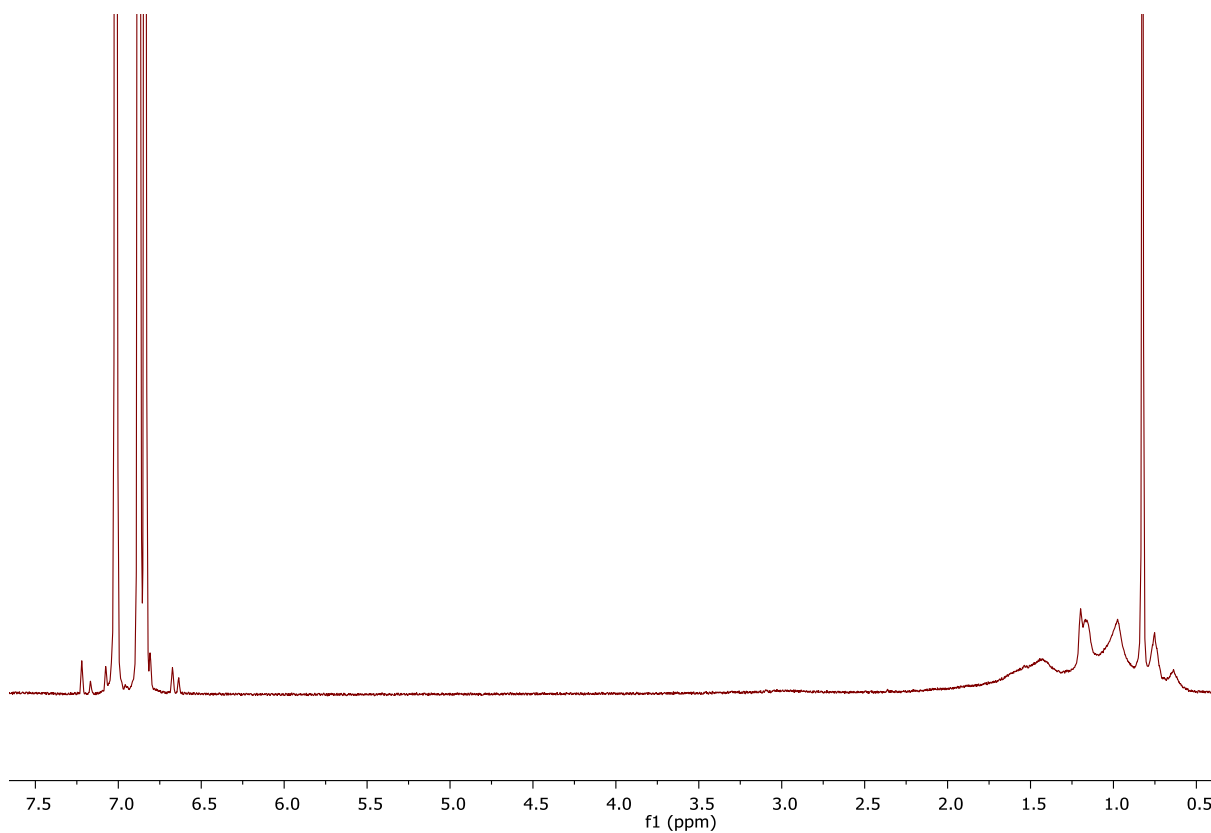

Figure S3:  $^1\text{H}$  NMR spectrum of PTPQx in chlorobenzene- $d_5$  at 80 °C.

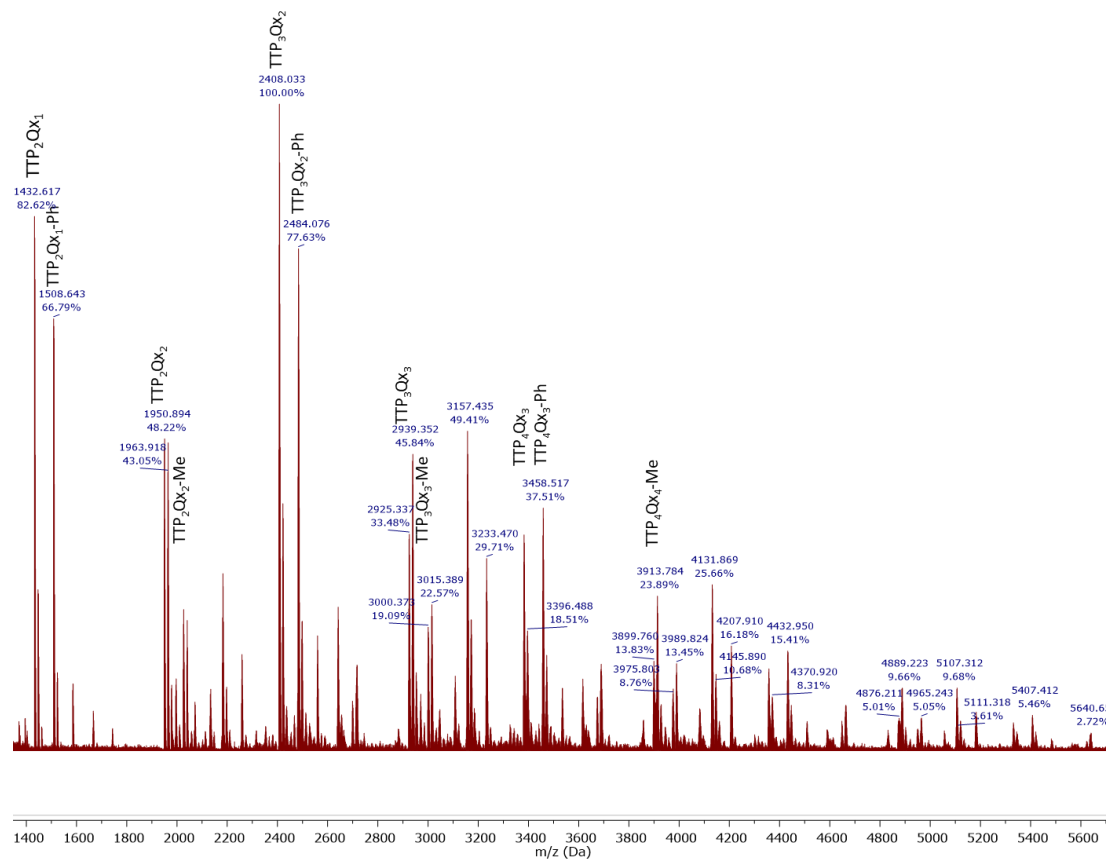

Figure S4: MALDI-ToF mass spectrum of PTPQx.

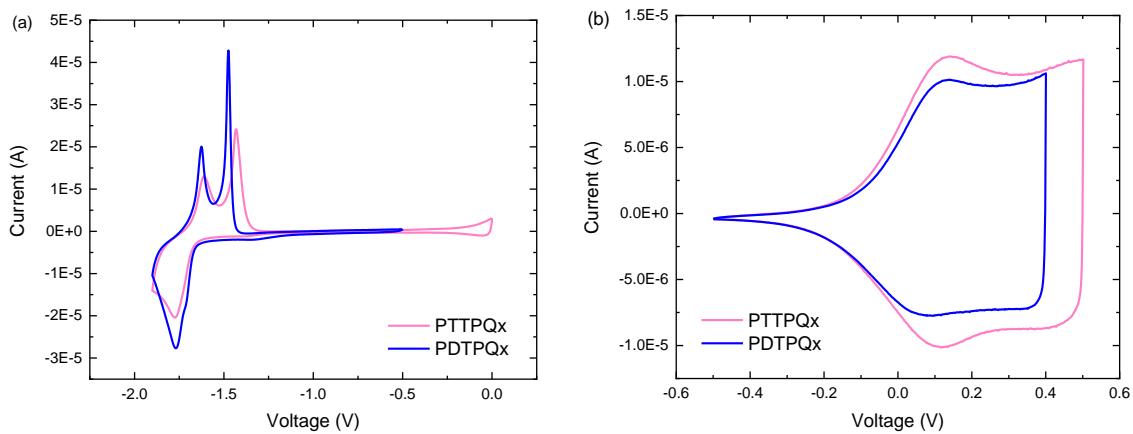

Figure S5: Overlay of the reduction (a) and oxidation (b) curves of PTPQx (pink) and PDTPQx (blue) obtained *via* cyclic voltammetry.

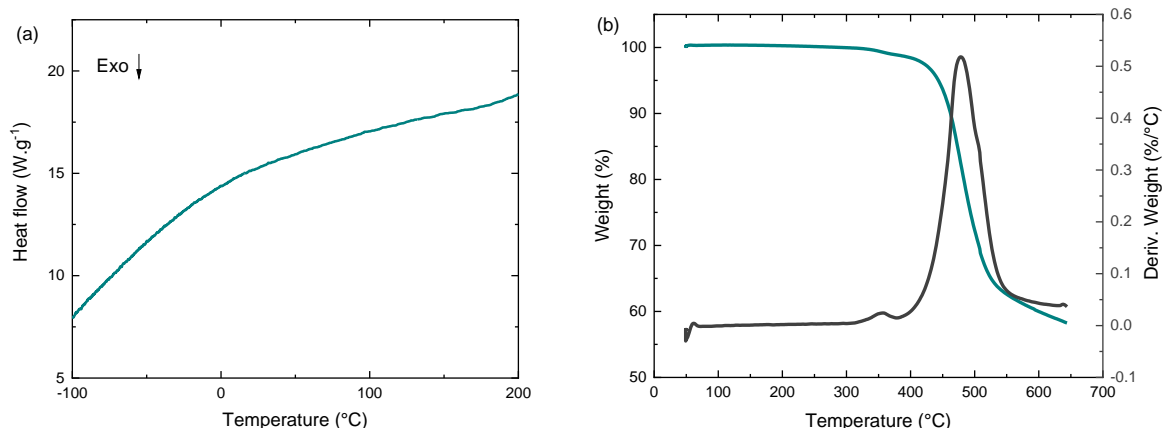

**Figure S6:** RHC measurement (2<sup>nd</sup> heating) (a), showing the absence of a melting peak and glass transition up to 250 °C, and TGA (b), showing mass loss starting at ~300 °C, for PTPQx.

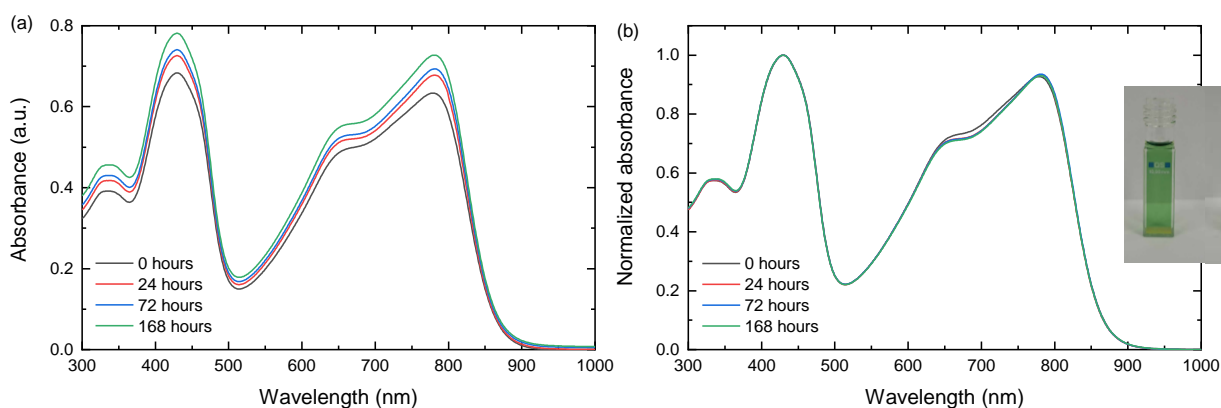

**Figure S7:** Absolute (a) and normalized (b) UV-Vis-NIR absorption spectra for a solution of PTPQx in chlorobenzene left open to the air for one week (inset: photographs of the polymer solution at the start and the end of the week).

### 3. Device manufacturing and characterization

Bulk heterojunction organic photodetectors (OPDs) for both donor polymers were prepared using the inverted architecture glass/ITO/ZnO/active layer/MoO<sub>3</sub>/Ag. Devices made from PDTPQx were prepared according to literature.<sup>6</sup> For PTPQx, the OPDs were prepared as reported below. The ITO (indium-tin-oxide) coated substrates (100 nm, Kintec, sheet resistivity 20 Ω sq<sup>-1</sup>) were thoroughly cleaned via sonication in acetone, followed by a UV/O<sub>3</sub> treatment for 30 min. ZnO was deposited by spin-coating with a layer thickness of ~20 nm. The ZnO layer was annealed at 200 °C for 20 min. Further processing was performed under nitrogen atmosphere in a glove box (< 1 ppm O<sub>2</sub> and H<sub>2</sub>O). The photoactive layer solution, consisting of the active polymer and PC<sub>61</sub>BM (Solenne), was then spin-coated from chloroform, chlorobenzene, or *ortho*-dichlorobenzene. The best performing devices were obtained with a blend solution of 1:3 (wt/wt) PTPQx:PC<sub>61</sub>BM, with a total concentration of 32 mg mL<sup>-1</sup> in chlorobenzene. The solution was stirred overnight at 40 °C to ensure complete dissolution. Finally, the MoO<sub>3</sub> (10 nm) hole transporting layer and Ag (100 nm) top electrode were sequentially deposited on top of the active layer through a shadow mask by thermal evaporation (< 5 × 10<sup>-6</sup> mbar) to afford photodetector devices with an active area of 0.8 mm<sup>2</sup>. The cavity OPDs were fabricated using the inverted device structure Eagle XG glass/Au (1.5 nm)/Ag (28 nm)/PEIE/active layer/MoO<sub>3</sub>/Ag. The semi-transparent thin Ag films were fabricated by thermal evaporation (< 5 × 10<sup>-6</sup> mbar) with an extremely thin Au seed layer beneath. The deposition rate for Au and Ag was 0.5 and 4 Å s<sup>-1</sup>,



respectively. All other parameters for the cavity OPDs were equal to the regular OPDs. The film thickness of the active layer was controlled by varying the spin speed. The freshly fabricated devices were measured in an inert atmosphere and light and dark  $J-V$  curves (forward scan with a step of 25 mV) were recorded using a Keithley 2400 Source Meter under AM1.5 1-sun illumination, provided by a solar simulator (Newport 91195A) with a silicon calibrated intensity equivalent to  $100 \text{ mW cm}^{-2}$ , and under dark, respectively. The  $\text{EQE}_{\text{PV}}$  spectrum for each cell was measured under chopped (123 Hz) monochromatic illumination from a Xe lamp (100 W, Newport) modulated by a Newport Cornerstone™ 130° Monochromator and an optical wheel chopper. The generated photocurrent from the solar cells was amplified with a Stanford Research System Model SR830 lock-in amplifier, and a calibrated silicon FDS100-CAL photodiode was employed as a reference cell. For the sensitive EQE measurements, an INVENIO R (Bruker Optics) with an external detector was employed. A low-noise current amplifier was used to amplify the photocurrent generated under illumination of the devices, with the illumination light modulated by the Fourier-transform infrared (FTIR) setup. The blend thickness was monitored by a Bruker Veeco Dektak XT profilometer. Atomic force microscopy (AFM) experiments were performed (on the devices used for the  $J-V$  measurements) with a JPK NanoWizard 3 AFM (JPK Instruments AG, Berlin, Germany) using AC mode in air. Silicon ACTA-50 tips from AppNano with cantilever length of  $\sim 125 \text{ nm}$ , spring constant of  $\sim 40 \text{ N m}^{-1}$  and resonance frequency of  $\sim 300 \text{ kHz}$  were used. The scan angle, set point height, gain values, and scan rate were adjusted according to the calibration of the AFM tip. Grazing incidence wide angle X-ray scattering was performed at the Stanford Synchrotron Radiation Lightsource on beamline 11-3, with an X-ray energy of 12.7 keV and an incidence angle of  $0.1^\circ$ . The sample to detector distance was 307.5 mm and was calibrated to a polycrystalline LaB6 standard. Measurements were performed in a helium chamber to minimize air scattering. All data were corrected for the geometric distortion of the flat detector used, normalized by exposure time, sample thickness, and monitor counts, and analyzed using Nika 1D SAXS1<sup>7</sup> and WAXstools2 software in Igor Pro.<sup>8</sup> Mobility measurements were done using a Space Charge Limited Current (SCLC) diode, and calculated from the equation  $J = (9\epsilon\epsilon_0\mu V^2)/(8L^3)$ .<sup>9</sup> The hole mobilities were determined using a hole only diode with the device architecture ITO/PEDOT:PSS/active layer/MoO<sub>3</sub>/Ag. Contact angles with water were measured with a Dataphysics contact angle system OCA 15 plus. The films were prepared by spin-coating solutions of the active layer materials on glass substrates. The materials were dissolved in chloroform (10 mg/mL) and the solutions were stirred at 50 °C before spin-coating.

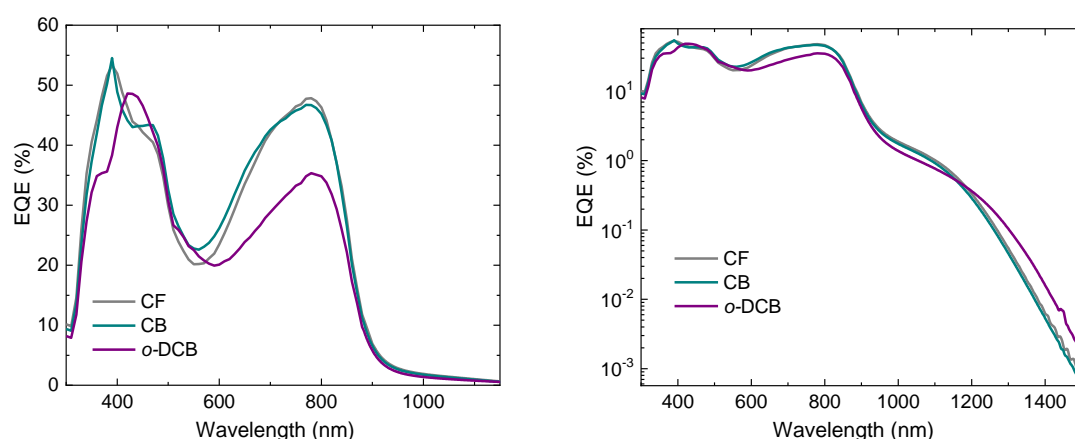

**Figure S8:** EQE spectra for inverted photodiode devices with the PTTPOx:PC<sub>61</sub>BM (1:3) active layer spin-coated from chloroform (CF), chlorobenzene (CB), and *ortho*-dichlorobenzene (*o*-DCB).

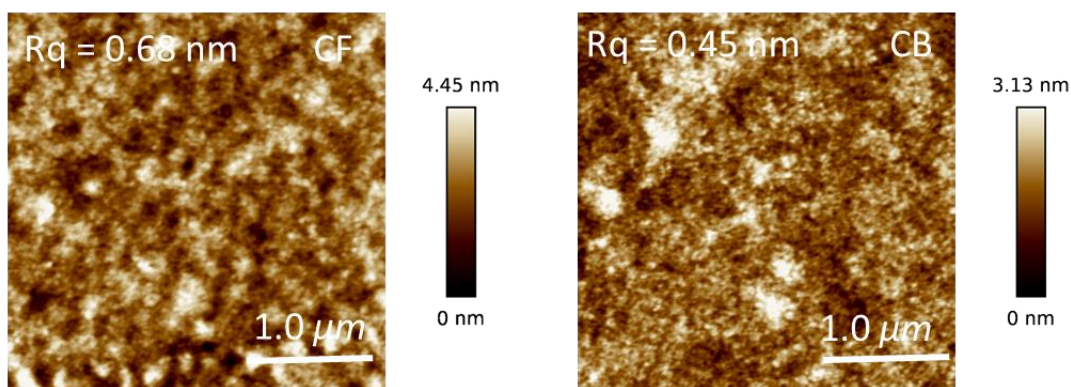

**Figure S9:** AFM images of PTPQx:PC<sub>61</sub>BM (1:3) blends spin-coated from CF (left) and CB (right), with an Rq of 0.68 and 0.45 nm, respectively.

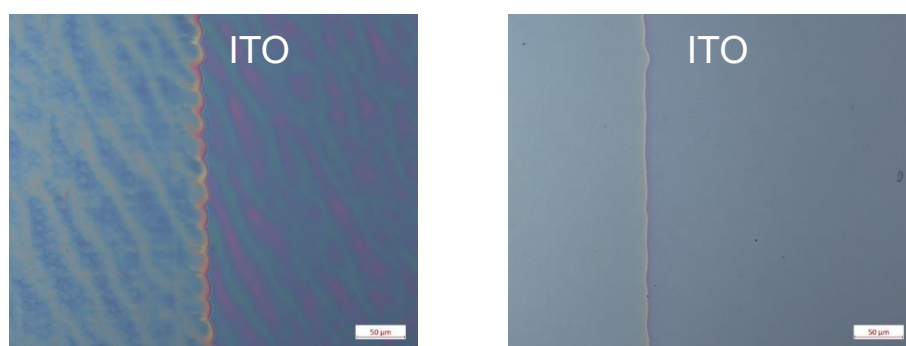

**Figure S10:** Optical microscopy images of the ITO-active layer interface for PTPQx:PC<sub>61</sub>BM (1:3) blends spin-coated from CF (left) and CB (right).

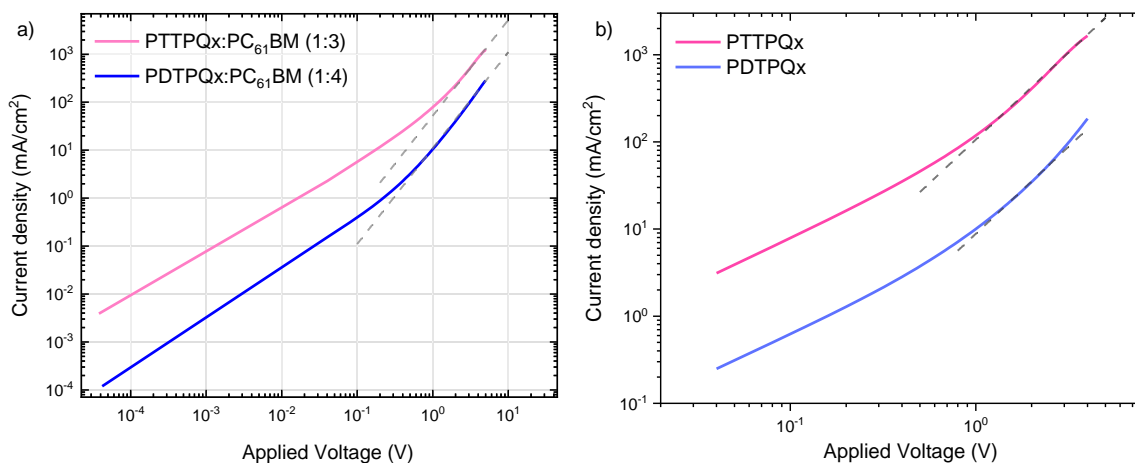

**Figure S11:** Current density versus applied voltage curves for the hole-only diode devices prepared from (a) blends of PTPQx:PC<sub>61</sub>BM (1:3) (pink) and PDTPQx:PC<sub>61</sub>BM (1:4) (blue), and (b) the pristine polymers PTPQx (pink) and PDTPQx (blue).

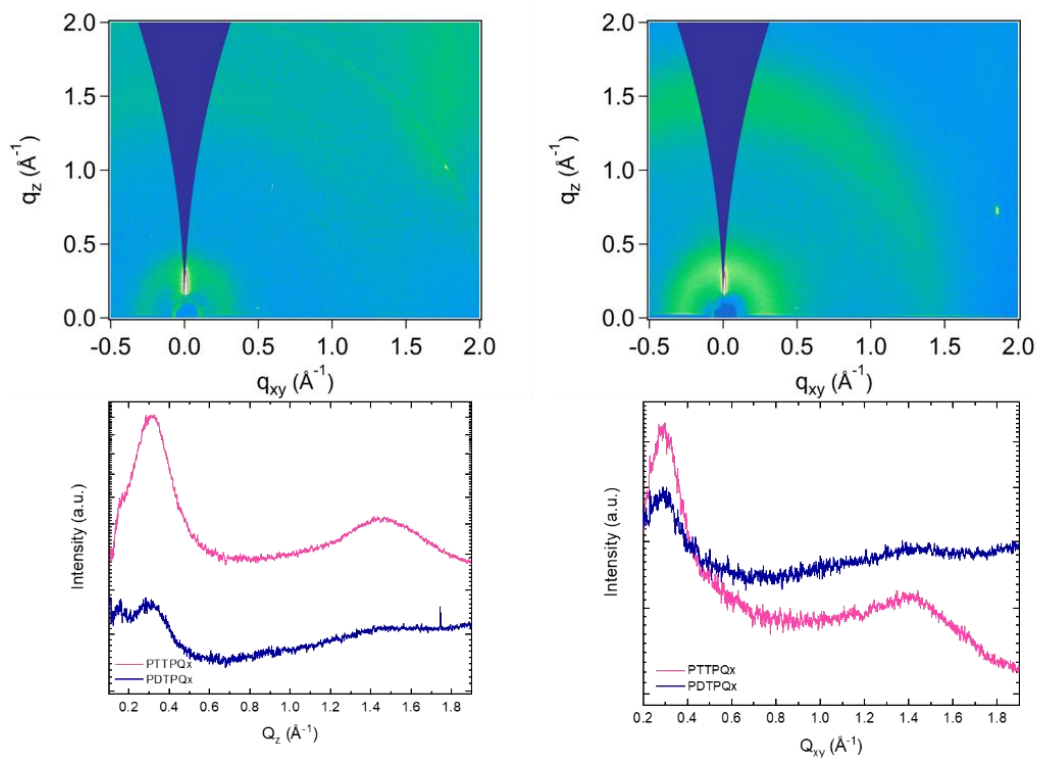

**Figure S12:** 2D-GIWAXS patterns for the neat PDTPQx (top left) and PTTQx (top right) polymers with lineouts in  $Q_z$  (bottom left) and  $Q_{xy}$  (bottom right).

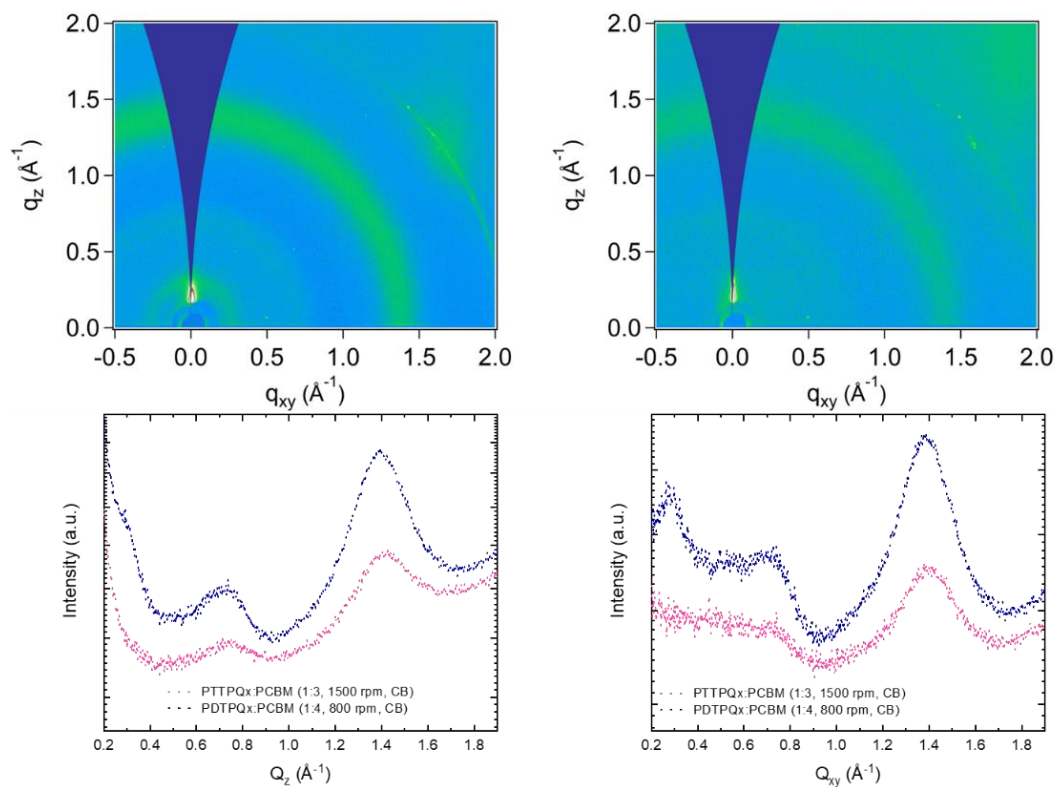

**Figure S13:** 2D-GIWAXS patterns for the PDTPQx (top left) and PTTQx (top right) polymers blended with PC<sub>61</sub>BM (in a 1:4 and 1:3 ratio, respectively), with lineouts in  $Q_z$  (bottom left) and  $Q_{xy}$  (bottom right).

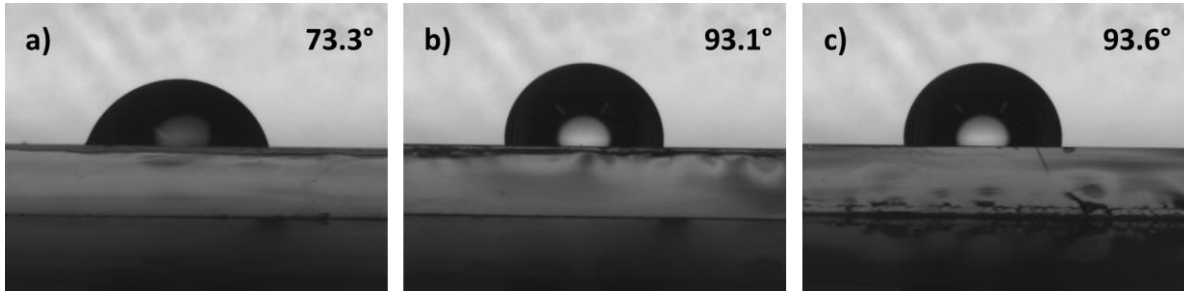

**Figure S14:** Water contact angles for films of the neat active layer materials: (a) PC<sub>61</sub>BM, (b) PDTPQx, and (c) PTTPOx.

**Table S1:** Fitting values calculated for both polymer blends based on Ref <sup>10</sup>.

| Blends                           | $E_{CT}$ (eV) | $\lambda$ (eV) | $f$ (eV <sup>2</sup> ) |
|----------------------------------|---------------|----------------|------------------------|
| PDTPQx:PC <sub>61</sub> BM (1:4) | 1.06          | 0.27           | 0.127                  |
| PTTPQx:PC <sub>61</sub> BM (1:3) | 1.01          | 0.15           | 0.135                  |

To determine  $E_{CT}$ , a fitting procedure was applied on the low energy tail of the sensitively measured EQE(E) spectrum, using the following equation:

$$EQE(E) \sim \exp\left(-\frac{(E - \lambda - E_{CT})^2}{4\lambda k_B T}\right)$$

with  $\lambda$  the reorganization energy,  $k_B$  the Boltzmann constant, and  $T$  the temperature (in this case room temperature, making  $k_B T$  equal to 0.025). To reliably consider the low energy part of the spectrum, the fitting was done on the natural logarithm of the EQE(E) spectrum.

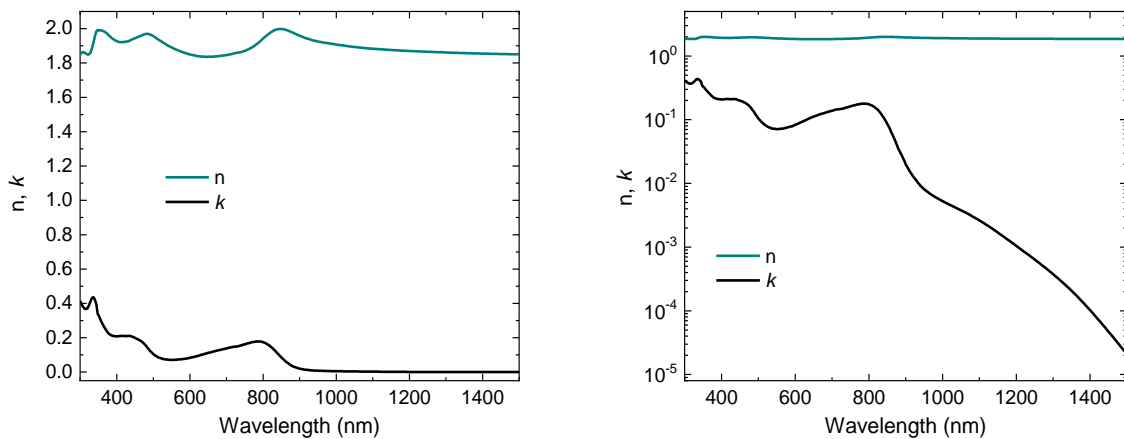

**Figure S15:** Refractive index ( $n$ ) and absorption coefficient ( $k$ ) for PTTPOx on a normal (a) and logarithmic (b) scale.

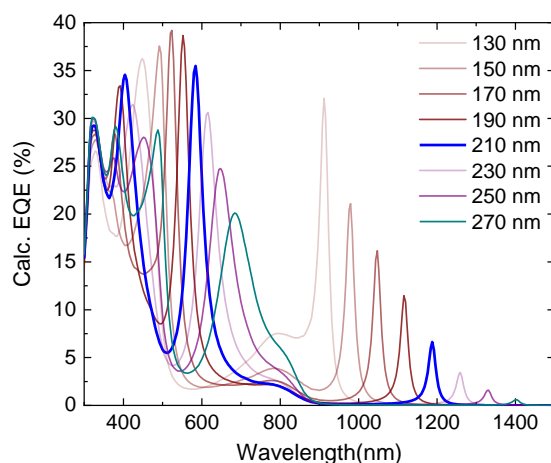

**Figure S16:** Simulated EQEs for the cavity device with device stack glass/Au (2 nm)/Ag (28 nm)/ZnO (40 nm)/active layer (130–270 nm)/MoO<sub>3</sub> (12 nm)/Ag (100 nm), assuming an internal quantum efficiency of 0.79.

**Table S2:** Performance parameters for the PTPQx-based optical cavity devices.

| Detector wavelength (nm) | EQE (%) | $R_{shunt}$ ( $\Omega \text{ cm}^2$ ) | $j_{noise}$ ( $\text{A cm}^{-1} \text{ Hz}^{-1/2}$ ) | Spectral response ( $\text{A W}^{-1}$ ) | $D^*$ (Jones) | FWHM (nm) |
|--------------------------|---------|---------------------------------------|------------------------------------------------------|-----------------------------------------|---------------|-----------|
| 921                      | 23      | 6.4E+05                               | 1.60E-13                                             | 1.71E-01                                | 1.07E+12      | 40        |
| 1020                     | 14      | 7.7E+05                               | 1.46E-13                                             | 1.15E-01                                | 7.88E+11      | 35        |
| 1153                     | 4.8     | 1.0E+06                               | 1.28E-13                                             | 4.46E-02                                | 3.48E+11      | 38        |
| 1252                     | 2.3     | 1.0E+06                               | 1.28E-13                                             | 2.32E-02                                | 1.81E+11      | 35        |
| 1348                     | 1.0     | 1.0E+06                               | 1.28E-13                                             | 1.09E-02                                | 8.48E+10      | 32        |
| 1448                     | 0.2     | 1.0E+06                               | 1.28E-13                                             | 2.34E-03                                | 1.82E+10      | 32        |

#### 4. References

- 1 S. Trasatti, *Pure Appl. Chem.*, 1986, **58**, 955–966.
- 2 A. J. Bard, L. R. Faulkner and H. S. White, *Fundamentals and Applications*, 2001, vol. 2.
- 3 L. Marin, L. Lutsen, D. Vanderzande and W. Maes, *Org. Biomol. Chem.*, 2013, **11**, 5866–5876.
- 4 J. T. Henssler and A. J. Matzger, *Org. Lett.*, 2009, **11**, 3144–3147.
- 5 Z. Wang, S. Yan, Z. Yang, Y. Zou, J. Chen, C. Xu, P. Mao, S. Ding, J. Chen, X. Zong, T. Qin and M. Liang, *Chem. Eng. J.*, 2022, **450**, 138189.
- 6 T. Vandermeeren, Q. Liu, S. Gielen, D. Theunissen, S. Frederix, M. Van Landeghem, Z. Liu, N. Van den Brande, J. D'Haen, J. Vanderspikken, L. Lutsen, K. Vandewal and W. Maes, *Dye. Pigment.*, 2022, **200**, 110130.
- 7 J. Ilavsky, *J. Appl. Crystallogr.*, 2012, **45**, 324–328.
- 8 S. D. Oosterhout, V. Savikhin, J. Zhang, Y. Zhang, M. A. Burgers, S. R. Marder, G. C. Bazan and M. F. Toney, *Chem. Mater.*, 2017, **29**, 3062–3069.
- 9 P. N. Murgatroyd, *J. Phys. D. Appl. Phys.*, 1970, **3**, 151–156.
- 10 K. Vandewal, K. Tvingstedt, A. Gadisa, O. Inganäs and J. V. Manca, *Phys. Rev. B - Condens. Matter Mater. Phys.*, 2010, **81**, 125204.
